# Supplementary material for: An Overview of Modeling Approaches for Compositional Control in III–V Ternary Nanowires
Source: MDPI journal article supplement (doi:10.3390/nano13101659), 2023-05-17
Supplement: s1 [file s1]

# Supplementary Information

## Theory

The difference of the chemical potentials between liquid and solid is given by

$$\Delta\mu = x\Delta\mu_{AD} + (1-x)\Delta\mu_{BD}, \quad (S1)$$

where the chemical potential differences of AD and BD pairs in the liquid and in the solid state are given by

$$\Delta\mu_{AD} = \mu_A^L + \mu_D^L - \mu_{AD}^S, \quad (S2)$$

$$\Delta\mu_{BD} = \mu_B^L + \mu_D^L - \mu_{BD}^S. \quad (S3)$$

The chemical potentials of the species in the liquid are expressed as  $\mu_i^L = \mu_i^0 + k_B T \ln(c_i) + \vartheta_i$ , namely

$$\mu_A^L = \mu_A^0 + k_B T \ln(c_A) + \omega_{AB} c_B^2 + \omega_{AD} c_D^2 + \omega_{AU} c_U^2 \quad (S4)$$

$$\begin{aligned} & + (\omega_{AB} + \omega_{AD} - \omega_{BD}) c_B c_D \\ & + (\omega_{AB} + \omega_{AU} - \omega_{BU}) c_B c_U \\ & + (\omega_{AD} + \omega_{AU} - \omega_{DU}) c_D c_U \\ & + (c_B c_D - 2c_A c_B c_D) \omega_{ABD} \\ & + (c_B c_U - 2c_A c_B c_U) \omega_{ABU} \\ & + (c_D c_U - 2c_A c_D c_U) \omega_{ADU} \\ & - 2c_B c_D c_U \omega_{BDU} \\ & + (2c_A c_B - c_B^2 - 2c_B c_A^2 \\ & + 2c_B^2 c_A) \omega'_{AB} \\ & + (2c_A c_D - c_D^2 - 2c_D c_A^2 \\ & + 2c_D^2 c_A) \omega'_{AD} \\ & + (2c_A c_U - c_U^2 - 2c_U c_A^2 \\ & + 2c_U^2 c_A) \omega'_{AU} \\ & + 2(c_B c_D^2 - c_B^2 c_D) \omega'_{BD} \\ & + 2(c_B c_U^2 - c_B^2 c_U) \omega'_{BU} \\ & + 2(c_D c_U^2 - c_D^2 c_U) \omega'_{DU}, \\ \mu_B^L = \mu_B^0 & + k_B T \ln(c_B) + \omega_{AB} c_A^2 + \omega_{BD} c_D^2 + \omega_{BU} c_U^2 \\ & + (\omega_{AB} + \omega_{BD} - \omega_{AD}) c_A c_D \\ & + (\omega_{AB} + \omega_{BU} - \omega_{AU}) c_A c_U \\ & + (\omega_{BD} + \omega_{BU} - \omega_{DU}) c_D c_U \\ & + (c_A c_D - 2c_A c_B c_D) \omega_{ABD} \\ & + (c_A c_U - 2c_A c_B c_U) \omega_{ABU} \\ & + (c_D c_U - 2c_B c_D c_U) \omega_{BDU} \\ & - 2c_A c_D c_U \omega_{ADU} \\ & + (2c_A c_B - c_A^2 - 2c_A c_B^2 \\ & + 2c_A^2 c_B) \omega'_{BA} \\ & + (2c_B c_D - c_D^2 - 2c_D c_B^2 \\ & + 2c_D^2 c_B) \omega'_{BD} \\ & + (2c_B c_U - c_U^2 - 2c_U c_B^2 \\ & + 2c_U^2 c_B) \omega'_{BU} \\ & + 2(c_A c_D^2 - c_A^2 c_D) \omega'_{AD} \\ & + 2(c_A c_U^2 - c_A^2 c_U) \omega'_{AU} \\ & + 2(c_D c_U^2 - c_D^2 c_U) \omega'_{DU}, \end{aligned} \quad (S5)$$

$$\begin{aligned}
\mu_D^l = & \mu_D^0 + k_B T \ln(c_D) + \omega_{AD} c_A^2 + \omega_{BD} c_B^2 \\
& + \omega_{DU} c_U^2 \\
& + (\omega_{AD} + \omega_{BD} - \omega_{AB}) c_A c_B \\
& + (\omega_{AD} + \omega_{DU} - \omega_{AU}) c_A c_U \\
& + (\omega_{BD} + \omega_{DU} - \omega_{BU}) c_B c_U \\
& + (c_A c_B - 2c_A c_B c_D) \omega_{ABD} \\
& + (c_A c_U - 2c_A c_D c_U) \omega_{ADU} \\
& + (c_B c_U - 2c_B c_D c_U) \omega_{BDU} \\
& - 2c_A c_B c_U \omega_{ABU} \\
& + (2c_A c_D - c_A^2 - 2c_A c_D^2 \\
& + 2c_A^2 c_D) \omega'_{DA} \\
& + (2c_B c_D - c_B^2 - 2c_B c_D^2 \\
& + 2c_B^2 c_D) \omega'_{DB} \\
& + (2c_D c_U - c_U^2 - 2c_U c_D^2 \\
& + 2c_U^2 c_D) \omega'_{DU} \\
& + 2(c_A c_B^2 - c_A^2 c_B) \omega'_{AB} \\
& + 2(c_A c_U^2 - c_A^2 c_U) \omega'_{AU} \\
& + 2(c_B c_U^2 - c_B^2 c_U) \omega'_{BU}.
\end{aligned} \tag{S6}$$

Here  $\mu^0$  is the Gibbs free energy of the corresponding pure element,  $\omega_{ij}$  and  $\omega_{ijk}$  are the binary and ternary interaction parameters.

The chemical potentials in the solid of AD and BD binary species are given by

$$\mu_{AD}^s = \mu_{AD}^0 + k_B T \ln x + (1-x)^2 [\omega_s + (4x-1)\omega'_s], \tag{S7}$$

$$\mu_{BD}^s = \mu_{BD}^0 + k_B T \ln(1-x) + x^2 [\omega_s + (4x-3)\omega'_s]. \tag{S8}$$

Here  $\omega_s$  and  $\omega'_s$  are the temperature dependent interaction parameters of zeroth and first order, and  $\mu^0$  is the Gibbs free energy of the corresponding binary compound.

The parameter  $b$  is given by [1]

$$\begin{aligned}
b = & \alpha - 6c_{tot}^2 \omega'_{AB} \\
& - 2c_{tot} [\omega_{AB} - 3c_{tot} \omega'_{AB} \\
& - c_D (\omega'_{AD} + \omega'_{BD}) \\
& - c_U (\omega'_{AU} + \omega'_{BU}) + c_D \omega_{ABD} \\
& + c_U \omega_{ABU}]
\end{aligned} \tag{S9}$$

with

$$\begin{aligned}
\alpha = & \Delta\mu_{AD}^0 - \Delta\mu_{BD}^0 \\
& + (\omega_{AB} - c_{tot} \omega'_{AB} - 2c_D \omega'_{BD} \\
& - 2c_U \omega'_{BU} + c_D \omega_{ABD} \\
& + c_U \omega_{ABU}) c_{tot} + (\omega_{AD} - \omega_{BD}) c_D \\
& + (\omega_{AU} - \omega_{BU}) c_U \\
& - (\omega'_{AD} - \omega'_{BD}) c_D^2 \\
& - (\omega'_{AU} - \omega'_{BU}) c_U^2 \\
& + (\omega_{ADU} - \omega_{BDU}) c_D c_U.
\end{aligned} \tag{S10}$$

The parameter  $b_D$  is given by

$$b_D = \mu_{AD}^0 - \mu_A^0 - \mu_D^0 - \vartheta_A - \vartheta_D. \tag{S11}$$

## Parameters for As-Ga-In, In-Ga-Sb and Al-Ga-As material systems

**Table S1.** Ternary interaction parameters of the As-Au-Ga-In-Sb system. The energy values are in J/mole and the temperature is in K.

| Ternary System | $\omega_{ijk}$       | $\omega_s$          | Refs. |
|----------------|----------------------|---------------------|-------|
| Al-As-Ga       | -55508.5 + 33.2087·T | 2187                | [2]   |
| Ga-In-Sb       | -5072.76 - 10.8842·T | 9093 - 2.8698·T     | [3]   |
| In-Ga-As       | -12889.5             | 19698.8 - 7.51693·T | [4]   |
| In-Ga-Au       | 20500                |                     | [5]   |
| Au-In-Sb       | 1129.0976 - 16.232·T |                     | [6]   |

**Table S2.** Binary interaction parameters of the As-Au-Ga-In-Sb system. The energy values are in J/mole and the temperature is in K.

| Binary Systems | $\omega_{ij}$                            | $\omega'_{ij}$                         | Refs. |
|----------------|------------------------------------------|----------------------------------------|-------|
| Al-Ga          | 2613.3 - 2.94533·T                       | 692.4 - 0.09271·T                      | [7]   |
| Al-As          | -15693 - 34.163·T                        |                                        | [7]   |
| As-Ga          | -25503.6 - 4.3109·T                      | -5174.7                                | [7]   |
| Ga-Sb          | -13953.8 + 71.07866·T - 9.6232·T·ln(T)   | 1722.9 - 1.92588·T                     | [7]   |
| As-In          | -15851 - 11.27053·T                      | -1219.5                                | [7]   |
| In-Sb          | -25631.2 + 102.9324·T - 13.45816·T·ln(T) | -2115.4 - 1.31907·T                    | [7]   |
| Ga-In          | 4450 + 1.19185·T                         | 0.25943                                | [8]   |
| Al-Au          | -131996.19 + 36.42·T                     | 40781.83 - 1.896·T                     | [9]   |
| Au-Sb          | -10288.0428 - 14.7865028·T               | -2901.66787 - 7.2503632·T              | [10]  |
| As-Au          | 18160.759 - 14.327686·T                  | -13132.906 + 13.229781·T               | [11]  |
| Au-In          | -76196.19 + 64.2914·T - 6.6375·T·ln(T)   | -31134.02 + 81.3582·T - 8.5134·T·ln(T) | [12]  |
| Au-Ga          | -71830.123 + 42.286·T - 4.289·T·ln(T)    | -22892.323 + 5.069·T                   | [13]  |

**Table S3.** The chemical potentials of the species in the solid. The energy values are in J/mole and the temperature is in K.

| Binary Systems | $\mu_{ij}^0$                                                                                                                   | Refs. |
|----------------|--------------------------------------------------------------------------------------------------------------------------------|-------|
| Al-As          | -117130+7.78·T + $GHSE_{Al}$ + $GHSE_{As}$                                                                                     | [7]   |
| Ga-As          | -104352 + 265.43256·T - 48.681258·T·ln(T) - 11.158E-04·T <sup>2</sup> + 127670·T <sup>-1</sup> - 7.1378E-07·T <sup>3</sup> (2) | [7]   |
| In-As          | -73057.2 + 230.91896·T - 45.187942·T·ln(T) - 0.00773·T <sup>2</sup> + 69438·T <sup>-1</sup> + 14.18E-08·T <sup>3</sup>         | [7]   |
| Ga-Sb          | -43476.2 - 21.07528·T + 5.385752·T·ln(T) - 0.00275582·T <sup>2</sup> + $GHSE_{Ga}$ + $GHSE_{Sb}$                               | [7]   |
| In-Sb          | -31698.6 + 0.586278·T + 2.587162·T·ln(T) + $GHSE_{In}$ + $GHSE_{Sb}$                                                           | [7]   |

**Table S4.** The chemical potentials of the species in the liquid. The energy values are in J/mole and the temperature is in K.

| Systems | $\mu_i^0$                                                                                                                                                                                                                                                         | Refs. |
|---------|-------------------------------------------------------------------------------------------------------------------------------------------------------------------------------------------------------------------------------------------------------------------|-------|
| Al      | (298.15<T<700) 3028.879 + 125.251171·T - 24.3671976·T·ln(T)<br>- 0.001884662·T <sup>2</sup> - 8.77664E-07·T <sup>3</sup> + 74092·T <sup>-1</sup> + 7.9337E-20·T <sup>7</sup>                                                                                      | [14]  |
|         | (700<T<933.47) - 271.21 + 211.206579·T - 38.5844296·T·ln(T)<br>+ 0.018531982·T <sup>2</sup> - 5.764227E-06·T <sup>3</sup> + 74092·T <sup>-1</sup> + 7.9337E-20·T <sup>7</sup>                                                                                     |       |
| As      | (298.15<T<1200) 24442.9 - 22.424679·T + $GHSE_{As}$                                                                                                                                                                                                               | [14]  |
| Ga      | (200<T<302.91) 5491.298-18.073995·T + $GHSE_{Ga}$ - 7.0171E-17·T <sup>7</sup>                                                                                                                                                                                     | [14]  |
|         | (302.91<T<4000) 5666.455-18.681147·T + $GHSE_{Ga}$ - 1.64547E+23·T <sup>-9</sup><br>(298.15<T<429.75) -3696.798 + 84.701255·T - 21.8386·T·ln(T)<br>- 0.00572566·T <sup>2</sup> - 2.120321E-06·T <sup>3</sup> - 22906·T <sup>-1</sup> - 5.59058E-20·T <sup>7</sup> |       |
| In      | (429.75<T<3800) - 3749.81 + 116.835784·T - 27.4562·T·ln(T)<br>+ 5.4607E-04·T <sup>2</sup> - 8.367E-08·T <sup>3</sup> - 211708·T <sup>-1</sup>                                                                                                                     | [14]  |
| Sb      | (298.15<T<903.78) 19822.328 - 21.923164·T + $GHSE_{Sb}$ - 1.74847E-20·T <sup>7</sup>                                                                                                                                                                              | [14]  |
|         | (903.78<T<2000) 8175.359 + 147.455986·T - 31.38·T·ln(T)                                                                                                                                                                                                           |       |

**Table S5.** GHSER. The energy values are in J/mole and the temperature is in K.

| Systems | GHSER <sub>i</sub>                                                                                                                                                            | Refs. |
|---------|-------------------------------------------------------------------------------------------------------------------------------------------------------------------------------|-------|
| Al      | (298.15<T<700) -7976.15 + 137.093038·T - 24.3671976·T·ln(T)<br>- 0.001884662·T <sup>2</sup> - 8.77664E-07·T <sup>3</sup> + 74092·T <sup>-1</sup>                              | [14]  |
|         | (700<T<933.47) -11276.24 + 223.048446·T - 8.5844296·T·ln(T)<br>+ 0.018531982·T <sup>2</sup> - 5.764227E-06·T <sup>3</sup> + 74092·T <sup>-1</sup>                             |       |
| As      | (298.15<T<1090) -7270.447 + 122.211069·T - 23.3144·T·ln(T)<br>- 0.00271613·T <sup>2</sup> + 11600·T <sup>-1</sup>                                                             | [14]  |
|         | (1090<T<1200) -10454.913 + 163.457433·T - 29.216037·T·ln(T)                                                                                                                   |       |
| Ga      | (298.15<T<302.91) -21312.331 + 585.263691·T - 108.228783·T·ln(T)<br>+ 0.227155636·T <sup>2</sup> - 1.18575257E-04·T <sup>3</sup> + 439954·T <sup>-1</sup>                     | [14]  |
|         | (302.91<T<4000) -7055.643 + 132.73019·T - 26.0692906·T·ln(T)<br>+ 1.506E-04·T <sup>2</sup> - 4.0173E-08·T <sup>3</sup> - 118332·T <sup>-1</sup> + 1.64547E+23·T <sup>-9</sup> |       |
| In      | (298.15<T<429.75) -6978.89 + 92.338115·T - 21.8386·T·ln(T)<br>- 0.00572566·T <sup>2</sup> - 2.120321E-06·T <sup>3</sup> - 22906·T <sup>-1</sup>                               | [14]  |
|         | (429.75<T<3800) -7033.516 + 124.476588·T - 27.4562·T·ln(T)<br>+ 5.4607E-04·T <sup>2</sup> - 8.367E-08·T <sup>3</sup> - 211708·T <sup>-1</sup> + 3.53116E+22·T <sup>-9</sup>   |       |
| Sb      | (298.15<T<903.78) -9242.858 + 156.154689·T - 30.5130752·T·ln(T)<br>+ 0.007748768·T <sup>2</sup> - 3.003415E-06·T <sup>3</sup> + 100625·T <sup>-1</sup>                        | [14]  |
|         | (903.78<T<2000) -11738.83 + 169.485872·T - 31.38·T·ln(T) + 1.616849E+27·T <sup>-9</sup>                                                                                       |       |

## References

- Leshchenko, E.D.; Ghasemi, M.; Dubrovskii, V.G.; Johansson, J. Nucleation-limited composition of ternary III–V nanowires forming from quaternary gold based liquid alloys. *CrystEngComm* **2018**, *20*, 1649-1655.
- Li, C.; Li, J.B.; Du, Z.; Lu, L.; Zhang, W. A thermodynamic reassessment of the Al-As-Ga system. *Journal of Phase Equilibria* **2001**, *22*, 26-33.
- Yang, J.; Watson, A. An assessment of phase diagram and thermodynamic properties of the gallium-Indium-antimony system. *Calphad* **1994**, *18*, 165-175.
- Shen, J.-Y.; Chatillon, C.; Ansara, I.; Watson, A.; Rugg, B.; Chart, T. Optimisation of the thermodynamic and phase diagram data in the ternary As-Ga-In system. *Calphad* **1995**, *19*, 215-226.
- Ghasemi, M.; Sundman, B.; Fries, S.G.; Johansson, J. The thermodynamic assessment of the Au–In–Ga system. *Journal of Alloys and Compounds* **2014**, *600*, 178-185.
- Gomidzelovic, L.; Zivkovic, D.; Mihajlovic, I.; Trujic, V. Predicting of thermodynamics properties of ternary Au-In-Sb system. *Archives of metallurgy and materials* **2006**, *51*, 355-363.
- Ansara, I.; Chatillon, C.; Lukas, H.L.; Nishizawa, T.; Ohtani, H.; Ishida, K.; Hillert, M.; Sundman, B.; Argent, B.B.; Watson, A.; et al. A binary database for III–V compound semiconductor systems. *Calphad* **1994**, *18*, 177-222.
- Anderson, T.J.; Ansara, I. The Ga-In (Gallium-Indium) System. *Journal of Phase Equilibria* **2007**, *12*, 64-72.
- Li, M.; Li, C.; Wang, F.; Luo, D.; Zhang, W. Thermodynamic assessment of the Al–Au system. *Journal of Alloys and Compounds* **2004**, *385*, 199-206.
- Kim, J.H.; Jeong, S.W.; Lee, H.M. A thermodynamic study of phase equilibria in the Au-Sb-Sn solder system. *Journal of Electronic Materials* **2002**, *31*, 557-563.
- Ghasemi, M.; Johansson, J. Phase diagrams for understanding gold-seeded growth of GaAs and InAs nanowires. *Journal of Physics D: Applied Physics* **2017**, *50*, 134002.
- Liu, H.S.; Cui, Y.; Ishida, K.; Jin, Z.P. Thermodynamic reassessment of the Au@In binary system. *Calphad* **2003**, *27*, 27-37.
- Wang, J.; Liu, Y.J.; Liu, L.B.; Zhou, H.Y.; Jin, Z.P. Thermodynamic assessment of the Au–Ga binary system. *Calphad* **2011**, *35*, 242-248.
- Dinsdale, A.T. SGTE data for pure elements. *Calphad* **1991**, *15*, 317-425.
